# Supplementary material for: Structure, optical and magnetic behaviour of meso-tetraphenylporphyrinatoiron(III) tetracyanoethenide, [FeIII(TPP)]+[TCNE]˙− †
Source: Royal Society of Chemistry journal article supplement (doi:10.1039/b007931f), 2001-01-01
Supplement: b007931f.pdf [file b007931f.pdf]

# *Electronic Supplementary Information*

## **Title**

Structure, Optical and Magnetic Behaviour of *meso*-Tetraphenylporphyrinatoiron(III) Tetracyanoethanide,  $[\text{Fe}^{\text{III}}\text{TPP}]^+[\text{TCNE}]^-$ .

## **Authors**

Shinji Mikami, Ken-ichi Sugiura,\* Tatsuo Maruta, Yonezo Maeda, Masaaki Ohba, Naoki Usuki, Hisashi Ōkawa, Tomoyuki Akutagawa, Sadafumi Nishihara, Takayoshi Nakamura, Kentaro Iwasaki, Nobuyuki Miyazaki, Shojun Hino, Eiji Asato, Joel S. Miller,\* and Yoshiteru Sakata,\*

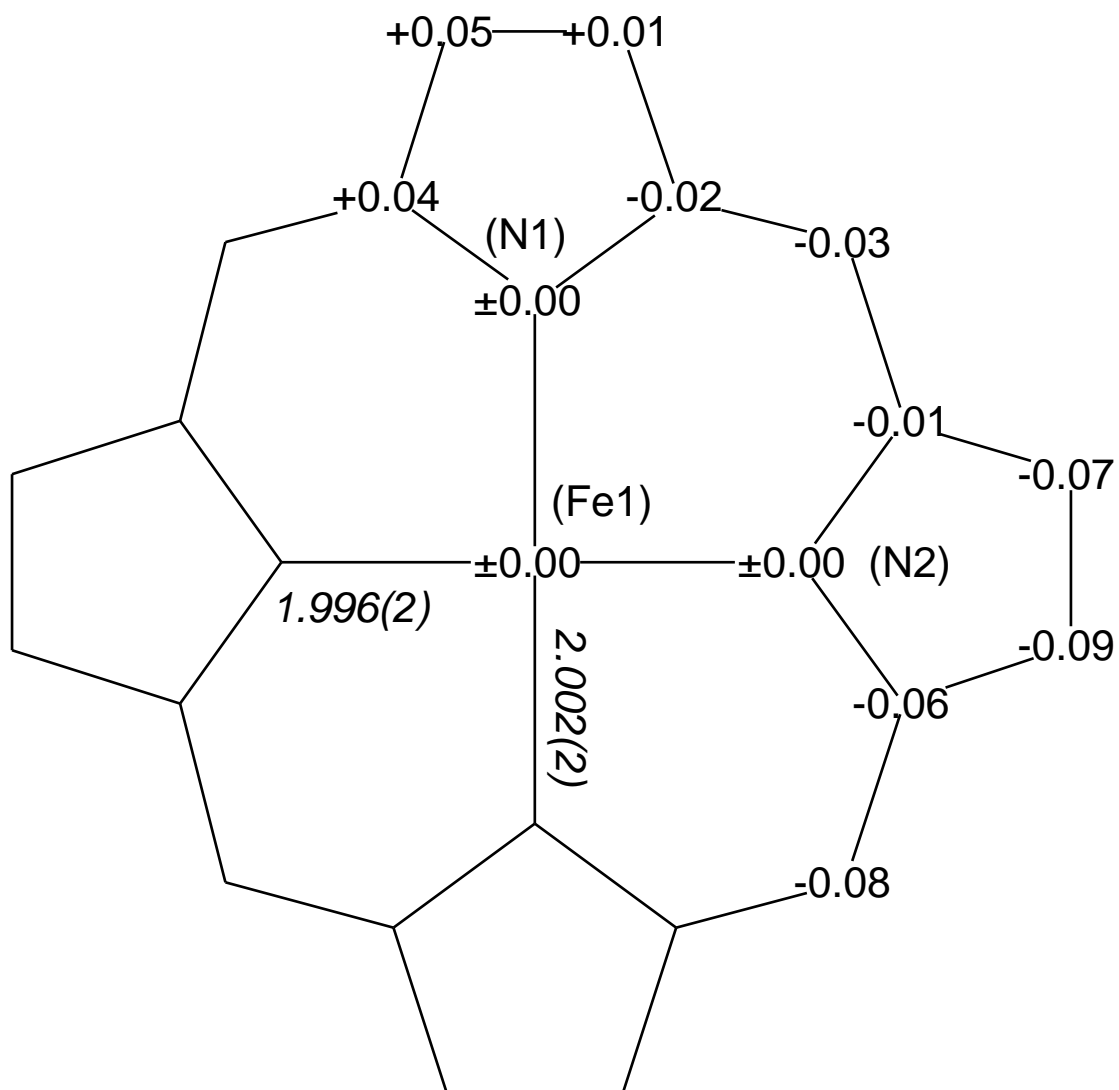

## Figure-S1

Deviations of the atoms from the least squares plane formed by the iron and four nitrogen atoms. All displacements are given in unit of 0.01 Å. The bond distances of *d*Fe-Nporphyrin are given in italic (Å).

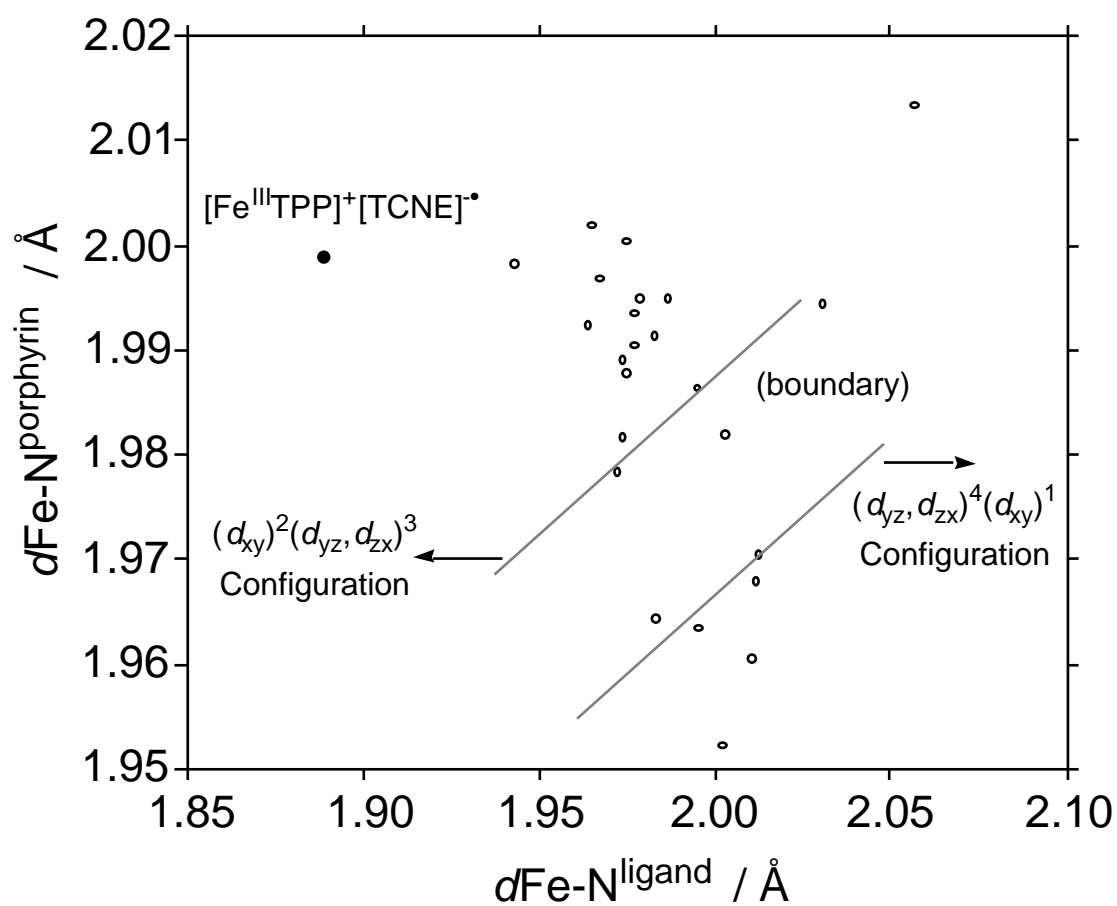

**Figure-S2**

Plott of  $d\text{Fe-Nporphyrin}$  and  $d\text{Fe-NTCNE}$  of  $[\text{Fe}^{\text{III}}\text{TPP}]^+[\text{TCNE}]^- \bullet 2\text{PhCl}$  on *Silver's-Map* ( $\bullet$ :  $[\text{Fe}^{\text{III}}\text{TPP}]^+[\text{TCNE}]^- \bullet 2\text{PhCl}$ ,  $\circ$ : reference data).<sup>43</sup> Each electronic configuration region was surrounded using the reference data.<sup>43</sup>
